# Supplementary material for: Effect of combined home-based, overground robotic-assisted gait training and usual physiotherapy on clinical functional outcomes in people with chronic stroke: A randomized controlled trial
Source: PubMed Central journal article supplement (PMC8191155; doi:10.1177/0269215520984133), 2020-12-27
Supplement: sj-pdf-1-cre-10.1177_0269215520984133.pdf [file sj-pdf-1-cre-10.1177_0269215520984133.pdf]

## **Supplementary Information**

### **Alter G Bionic leg orthosis**

The range of motion and amount of assistance the leg gives the user is customizable through a range of device settings. The settings are summarized below:

**Assistance** refers to the amount of support the device provides to the user to help with extension of the lower extremity. This is programmed as a percentage of the individual's single-limb bodyweight, whereby a higher value demonstrates a greater contribution from the robotic device.

**Threshold** refers to the percentage of single limb body weight that must be applied to the footplate before assistance will be provided by the device. This is programmed as a percentage of the individual's single-limb bodyweight, whereby a lower value demonstrates a greater contribution from the robotic device (i.e., it is more sensitive to small weight shifts.)

**Resistance** refers to the support provided during descent (flexion moment) that a user will experience during such tasks as sitting down or descending stairs. This setting remained the same throughout the 10-week program, as per manufacturers' guidelines.

**Knee extension** refers to the degrees from full extension to which the device will provide assistance and is comfortable for the patient. This setting remained the same throughout the 10-week program, as per manufacturers' guidelines.
